# Supplementary material
Source: PubMed Central journal article supplement (PMC4260549)
Supplement: pnas.201410095SI.pdf [file pnas.201410095SI.pdf]

# Supporting Information

Kaczmarczyk et al. 10.1073/pnas.1410095111

## SI Materials and Methods

### Plasmid Construction.

(i) **Construction of transposon vectors.** *vanR* and the *vanR-vanAB* intergenic region were amplified from plasmid pRVYFPC-2 (1) with primers VanR\_R/VanR\_F and cloned in pCM62 (2) between PciI/HindIII. The -10 region (AAGATT) of P<sub>vanAB</sub> was then changed to TAACTG using Quickchange PCR (Agilent) and primers Pvan2\_F/Pvan2\_R. Subsequently, the ribosome binding site (RBS) of *vanR* was changed by replacing an internal NcoI/MunI fragment with annealed oligonucleotides VanR\_RBS2\_s/VanR\_RBS2\_as. *vanR* and the modified *vanR-vanAB* intergenic region were amplified with primers VanR\_F/Pvan\_R2 and cloned in pAK401 between PciI/HindIII, giving pAK409. *tnp* was then amplified from plasmid pRK27 (3) with primers tnp\_Oend\_F/tnp\_R and cloned in pAK409 between AseI/PvuI, giving pAK409-tnp. Next, *cat* was amplified from pBAD33 (4) with primers CAT\_F\_SpeI/CAT\_R\_Iend\_PvuI and cloned in pAK409-tnp, giving pAK411, the final mini-Tn5 transposon vector. pAlmar2 (a gift from Urs Jenal, Biozentrum Basel, Basel, Switzerland), was used as a template to generate a derivative of *himar1C9* (5) that encodes, in addition, the hyperactive W119A mutation (6) by overlap PCR using primer pairs Himar1\_F/Himar1W119A\_R and Himar1W119A\_F/Himar1\_R. The *himar* mutant allele, which we named *himar1C9W*, was cloned in pAK409, giving pAK409-himar1C9W. Then, *cat* was amplified from pBAD33 using primers CAT\_F\_SpeI/CAT\_himar1ITR\_R and cloned between SpeI/PvuI of pAK409-himar1C9W, yielding pAK415, the final *himar*-based transposon vector.

(ii) **Plasmids for genetic selection and lacZ reporter plasmids.** *rpsL1* was amplified from pAK405 (7) with primers rpsL88\_RBS\_F/rpsL88\_R2 and cloned in pAK127 (8) via BamHI/EcoRI, giving pAK134. Next, the  $\sigma^{\text{EcfG}}$ -dependent *ecfG2* promoter was amplified from *S. melonis* Fr1 genomic DNA (gDNA) with primers ecfG2p\_F2/ecfG2p\_R2 and cloned in pAK134 via HindIII/XbaI, giving pAK145. pAK128 (8) was digested with HindIII/BamHI, and a fragment containing the *nepR* promoter generated by annealing of oligonucleotides nepRpcore\_a/nepRpcore\_as was inserted upstream of *syfp2*, yielding pAK128-nepRpcore. A fragment containing terminators, *nepRp*, and *syfp2* was amplified from pAK128-nepRpcore using nepR-CAS\_F/nepR-CAS\_R and inserted in pUC18-mini-Tn7T-Gm (9) via ApaI/XhoI, giving pAK406. Plasmid pAK144 was constructed by amplifying the gene encoding FLP recombinase from pFLP3 (9) using primers FLP\_F/FLP\_R, partial digestion with EcoRI and full digestion with MluI, and ligation in the same sites of pAK130 (8). The  $\sigma^{\text{EcfG}}$ -dependent *nhaA2* promoter was amplified from gDNA with primers nhaA2p\_F/nhaA2p\_R and cloned in the *lacZ* reporter plasmid pAK501 (8) via HindIII/Acc65I, giving pAK501-nhaA2p. The  $\sigma^{\text{EcfG}}$ -independent *rpmB* promoter was amplified from gDNA with primers rpmB\_F/rpmB\_R and cloned in pAK501 via HindIII/Acc65I, giving pAK501-rpmBp. pAK501-nepRp was described previously (8).

(iii) **pENTR and expression plasmids.** Full-length *pak* ORFs and truncated ORFs only encoding the kinase domain (for *pakA*, *pakB*, and *pakE*) were amplified by PCR from gDNA and cloned in pENTR4a or pENTR4b as detailed in Table S2. pENTR4a is a derivative of pENTR4 (Invitrogen) obtained by excision of *ccdB* by EcoRI and self-ligation. pENTR4b is a derivative of pENTR4a that includes a sequence encoding a Gly-Ser-rich linker upstream of the multiple cloning site and was obtained by inverse PCR using primers pENTR4\_linker\_F/pENTR4\_linker\_R,

followed by self-ligation of the PCR product. *sdrG* and *phyR* were similarly cloned in pENTR4b and pENTR4a, respectively. Point mutations were introduced in pENTR plasmids by Quickchange PCR. Primers are listed in Table S2. ORFs were recombined into pQYD (8) for expression in *Sphingomonas* and/or pDEST-MBPHis (10) (Addgene plasmid 11085) for protein expression and purification in *E. coli* using LR Clonase II mix (Invitrogen). For complementation experiments, *sdrG* was cloned in pAK126a (7) using primers BK51comp\_F/BK51comp\_R via XbaI/Acc65I. Point mutations were introduced by overlap PCR and cloning in the same sites using the same flanking primers and the mutagenic primers listed in Table S2. The constructs for NepR and PhyR overproduction and purification, pET26bII-NepR and pET26bII-PhyR, were described previously (11). *sdrG* was amplified using primers 2886\_pET\_F/2886\_pET\_R and cloned in pET26bII (a gift from W. Malaga, Institute of Pharmacology and Structural Biology, Toulouse, France) via NdeI/Acc65I, giving pET26bII-SdrG that was used for protein purification. For bacterial two-hybrid analysis (12), full-length *pak* ORFs were cloned in pUT18 and pKNT25 (Euromedex) with primers listed in Table S2.

(iv) **Plasmids for mutant construction.** Approximately 750 bp of upstream and downstream regions of genes to be deleted (or the codon to be exchanged in the case of *phyR*<sup>D194A</sup>) were PCR-amplified and joined using overlap PCR, and then cloned in pAK405. Primers are listed in Table S2.

**Strain Construction.** All *Sphingomonas* in-frame deletion mutants were constructed by double homologous recombination using pAK405 as described previously (7). For allelic exchange of chromosomal *phyR* for *phyR*<sup>D194A</sup>, a similar strategy using pAK405 was used. To delete *pakD* with complementation *in trans* on plasmid pQYD-PakD, pAK405-pakD was first integrated in the genome of strain JVZ857, followed by transformation of pQYD-PakD and subsequent counterselection of the resulting strain on LB containing tetracycline, streptomycin, and 5  $\mu$ M cumate. Colonies were screened for *pakD* WT or mutant genotype by PCR. As a control, the same colonies were used to perform PCR on a chromosomal region amplifying the *prfF* ORF and a region on the megaplasmid that is positioned approximately 180° apart from *pakD*. For all colonies for which PCR did not amplify the *pakD* region, it also did not amplify the megaplasmid control region but did amplify the chromosomal control region, suggesting loss of the megaplasmid. The strain used for selection (JVZ1919) was obtained in several steps, starting from the WT strain JVZ857. First, the *nepRp-syfp2* transcriptional fusion was inserted in the *attTn7* locus of JVZ857 by co-transformation of pAK406 and the helper plasmid pTNS2 (9) and selection on gentamycin (Gm). Next, this strain was transformed with plasmid pAK144 that constitutively expresses the FLP recombinase, leading to excision of the chromosomal Gm-resistance cassette associated with Tn7. Next, this strain was cured from pAK144, which also expresses the dominant streptomycin-sensitive *rpsL1* allele, by plating on streptomycin (Sm), giving strain JVZ1841. Finally, plasmid pAK145 harboring the *ecfG2p-rpsL1* fusion was transformed into JVZ1841, giving JVZ1919.

**Western Blots.** To follow *pak* expression, 1 mL of bacterial culture before or 2 h after addition of cumate was spun down (12,000  $\times$  g, 2 min), and cell pellets were resuspended in 1 $\times$  Lämmli buffer, corresponding to an OD<sub>600</sub> of 10, and incubated at 99 °C for 15 min. Samples were subjected to SDS/PAGE [12.5% (wt/vol) acrylamide],

proteins were transferred to nitrocellulose membranes by semidry blotting, and proteins were detected using mouse  $\alpha$ -GFP antibody (GF28R; Pierce) and goat  $\alpha$ -mouse HRP-coupled secondary antibody (Biorad). As a control, the same samples were probed with rabbit  $\alpha$ -GroEL (*E. coli*) serum and goat  $\alpha$ -rabbit HRP-coupled secondary antibody (Biorad). Chemiluminescence was detected using ECL Western Blotting Detection Reagent (GE Healthcare).

**Protein Expression and Purification.** PhyR and NepR were overproduced as described previously (11). Overproduction of all other proteins was carried out in LB-Lennox medium in 200- to 400-mL cultures, with the following details. For SdrG overproduction, *E. coli* BL21(DE3)/pET26bII-SdrG was grown to an  $OD_{600}$  of 0.8 at 37 °C and induced by addition of 1 mM isopropyl  $\beta$ -D-1-thiogalactopyranoside (IPTG). Cells were harvested after 4 h. All Paks were overproduced as His6-MBP fusions from pDEST-HisMBP. N-terminally truncated PakB (amino acids 297–507) was overproduced in BL21(DE3); the strain was grown to an  $OD_{600}$  of 0.6–0.8 at 37 °C, shifted to 25 °C, and induced with 50  $\mu$ M IPTG. Cells were harvested after 16 h. N-terminally truncated PakA (amino acids 287–488) and PakE (amino acids 535–726) and full-length PakG were overproduced in Rosetta2 (DE3); strains were grown to an  $OD_{600}$  of 0.6–0.8 at 28 °C, shifted to 15 °C, and induced with 100  $\mu$ M IPTG after 1 h of equilibration, and cells were harvested after 24 h. Full-length PakC was overproduced in the same way, but in BL21(DE3). Full-length PakF was overproduced in BL21(DE3); the strain was grown to an  $OD_{600}$  of 0.6–0.8 at 28 °C, shifted to 18 °C, and induced with 50  $\mu$ M IPTG after 30 min of equilibration, and cells were harvested after 16–24 h.

Cell pellets were washed once in PBS and resuspended in 7.2 mL of wash buffer [20 mM Hepes-KOH (pH 8.0), 0.5 M NaCl, 10% (vol/vol) glycerol, 20 mM imidazole, 0.1% Triton X-100] supplemented with lysozyme (0.1 mg/mL), DNase I (0.01 mg/mL), 800  $\mu$ L of BugBuster 10 $\times$  Protein Extraction Reagent (Novagen), and one tablet of EDTA-free Complete protease inhibitor mixture (Roche). Cell lysis was allowed to proceed at room temperature with mild shaking until the suspension was clear and nonviscous. All following steps were performed at 4 °C. Debris was pelleted (12,000  $\times$  g, 20 min), and the supernatant was filtered (pore size of 0.22  $\mu$ m), incubated with 800  $\mu$ L of nickel-nitrilotriacetic acid (Ni-NTA) agarose slurry (Qiagen) for 1 h, and loaded on a polypropylene column (Qiagen). Ni-NTA agarose was washed with 30–50 mL of wash buffer by gravity flow, and proteins were eluted in 2.5 mL of elution buffer [20 mM Hepes-KOH (pH 8.0), 0.5 M NaCl, 10% (vol/vol) glycerol, 250 mM imidazole]. The eluate was immediately loaded on a PD-10 column (GE Healthcare) pre-equilibrated in kinase buffer [10 mM Hepes-KOH (pH 8.0), 50 mM KCl, 10% (vol/vol) glycerol, 0.1 mM EDTA, 1 mM DTT], and proteins were eluted with 3.5 mL of kinase buffer. Purified proteins were stored at –20 °C, and protein concentrations were determined using a NanoDrop 2000 UV-VIS spectrometer (Thermo Scientific) or a Biorad Protein Assay (Biorad).

**PhyR~P-NepR Complex Formation and Native Gels.** One hundred-microliter reactions containing combinations (Fig. S44) of PhyR (5  $\mu$ M), NepR (7.5  $\mu$ M), and/or acetyl phosphate (AcP; 5 mM) in kinase buffer were incubated at room temperature for 30 min to allow PhyR phosphorylation and complex formation, followed by removal of AcP using Micro Bio-Spin P-6 columns (Biorad) pre-equilibrated with kinase buffer and elution of proteins with 100  $\mu$ L of kinase buffer. Eluted proteins/complexes were split into four 25- $\mu$ L aliquots, and aliquots were either left untreated (control) or NepR alone (final concentration of 20  $\mu$ M) or NepR and AcP (final concentration of 10 mM) were added (total reaction volume of 50  $\mu$ L), followed by incubation at room temperature for 15 min to allow complex formation. A total of 5 $\times$  native loading buffer [310 mM Tris-HCl (pH 6.8), 50% (vol/vol)

glycerol, bromophenol blue] was added, and proteins/protein complexes were separated on native gels (to observe complex formation). The same samples (in Lämmli buffer) were also subjected to standard SDS/PAGE. Native PAGE was performed as follows. The separating gel contained 375 mM Tris-HCl (pH 8.8) and 7.5% acrylamide/bis acrylamide solution (30:0.8; Protogel), and the stacking gel contained 125 mM Tris-HCl (pH 6.8) and 3.75% acrylamide/bis acrylamide solution (30:0.8; Protogel); gels were solidified using ammonium persulfate (APS) and N,N,N',N'-tetramethylethylenediamine (TEMED) (Protogel). Running buffer was 25 mM Tris base and 190 mM glycine, adjusted to pH 8.3. The gel was run at room temperature at 150 V for 45 min and stained with Coomassie Brilliant Blue, and proteins were transferred to nitrocellulose membranes using semidry blotting and blotting buffer containing 20% methanol, 25 mM Tris base, and 190 mM glycine, adjusted to pH 8.3. Immunoblotting was performed using rabbit  $\alpha$ -PhyR serum and goat  $\alpha$ -rabbit HRP-coupled antibodies (Biorad), followed by chemiluminescence detection using ECL Western Blotting Detection Reagent.

**Genetic Selection for “PhyR Cascade Down” Mutants.** The “selection strain” JVZ1919 was subjected to random transposon mutagenesis by conjugation of plasmids pAK411 (mTn5) or pAK415 (*himarI*C9W) from *E. coli* S17-1 $\lambda$ pir (13), as described previously (7). Mating mixtures were plated on LB-Lennox medium containing kanamycin (50  $\mu$ g/mL, for selection of transposon insertion mutants), carbenicillin (50  $\mu$ g/mL, for *E. coli* counterselection), tetracycline (10  $\mu$ g/mL, for maintenance of plasmid pAK145 carrying the *ecfG2p-rpsL1* fusion), and Sm (60  $\mu$ g/mL, for selection of “cascade down” mutants). To estimate the efficiency of random mutagenesis, a 10-fold serial dilution was plated on otherwise identical medium lacking Sm, giving an estimate of ca. 0.5–2 Mio mutants per mating. Colonies appearing after 3–4 d were purified by restreaking once on the same medium, and they were then screened for reduced activity of the *nepRp-syfp2* fusion using an IVIS Spectrum (Caliper Life Sciences). Transposon insertion sites were mapped using semi-arbitrary PCR and sequencing of PCR products. The *sdrG* mutant was isolated using the mTn5 transposon, which has inserted after nucleotide 27 of the annotated ORF.

**Transposon Insertion Site Mapping Using Semiarbitrary PCR.** A small loop of bacteria was resuspended in 100  $\mu$ L of 50 mM NaOH and incubated at 99 °C for 10 min. Cell debris was briefly spun down, and 1  $\mu$ L of the supernatant was used as a template for the subsequent PCR. The first PCR assay was carried out in a total volume of 20  $\mu$ L using Phusion polymerase (Thermo Scientific) in GC buffer and primers Arb-P1, Arb-P2, Arb-P3, and pAK411-nested1 (0.4  $\mu$ M each) according to the supplier’s recommendations, except that the DMSO concentration was raised to 10% (vol/vol). The cycling parameters were as follows: 98 °C for 2 min; 98 °C for 10 s, 30 °C for 20 s, and 72 °C for 30 s (six cycles); 98 °C for 10 s, 45 °C for 20 s, and 72 °C for 30 s (30 cycles); 72 °C for 1 min; and hold at 10 °C. The PCR assay was column-purified using a NucleoSpin Gel and PCR Clean-Up Kit (Macherey–Nagel) with elution in 50  $\mu$ L. One microliter of purified PCR product was used as a template for the second PCR assay in a total volume of 50  $\mu$ L using Phusion polymerase in GC buffer containing 10% (vol/vol) DMSO and primers Anchor-P and pAK411-nested2 (0.4  $\mu$ M each). The cycling parameters for the second PCR assay were as follows: 95 °C for 2 min; 95 °C for 10 s, 61 °C for 10 s, and 72 °C for 30 s (five cycles); 95 °C for 10 s, 58 °C for 10 s, and 72 °C for 30 s (31 cycles); 72 °C for 30 s; and hold at 10 °C. The PCR product was column-purified as described above, except that the elution volume was 20  $\mu$ L. Eight microliters of purified PCR product was sent for sequencing (Microsynth) using primer pAK411-nested2.

1. Thanbichler M, Iniesta AA, Shapiro L (2007) A comprehensive set of plasmids for vanillate- and xylose-inducible gene expression in *Caulobacter crescentus*. *Nucleic Acids Res* 35(20):e137.
2. Marx CJ, Lidstrom ME (2001) Development of improved versatile broad-host-range vectors for use in methylotrophs and other Gram-negative bacteria. *Microbiology* 147(Pt 8):2065–2075.
3. Larsen RA, Wilson MM, Guss AM, Metcalf WW (2002) Genetic analysis of pigment biosynthesis in *Xanthobacter autotrophicus* Py2 using a new, highly efficient transposon mutagenesis system that is functional in a wide variety of bacteria. *Arch Microbiol* 178(3):193–201.
4. Guzman LM, Belin D, Carson MJ, Beckwith J (1995) Tight regulation, modulation, and high-level expression by vectors containing the arabinose PBAD promoter. *J Bacteriol* 177(14):4121–4130.
5. Lampe DJ, Akerley BJ, Rubin EJ, Mekalanos JJ, Robertson HM (1999) Hyperactive transposase mutants of the Himar1 mariner transposon. *Proc Natl Acad Sci USA* 96(20):11428–11433.
6. Lampe DJ (2010) Bacterial genetic methods to explore the biology of mariner transposons. *Genetica* 138(5):499–508.
7. Kaczmarczyk A, Vorholt JA, Francez-Charlot A (2012) Markerless gene deletion system for sphingomonads. *Appl Environ Microbiol* 78(10):3774–3777.
8. Kaczmarczyk A, Vorholt JA, Francez-Charlot A (2013) Cumate-inducible gene expression system for sphingomonads and other Alphaproteobacteria. *Appl Environ Microbiol* 79(21):6795–6802.
9. Choi KH, et al. (2005) A Tn7-based broad-range bacterial cloning and expression system. *Nat Methods* 2(6):443–448.
10. Nallamsetty S, Austin BP, Penrose KJ, Waugh DS (2005) Gateway vectors for the production of combinatorially-tagged His6-MBP fusion proteins in the cytoplasm and periplasm of *Escherichia coli*. *Protein Sci* 14(12):2964–2971.
11. Kaczmarczyk A, et al. (2011) Role of *Sphingomonas* sp. strain Fr1 PhyR-NepR- $\sigma^{EcG}$  cascade in general stress response and identification of a negative regulator of PhyR. *J Bacteriol* 193(23):6629–6638.
12. Karimova G, Pidoux J, Ullmann A, Ladant D (1998) A bacterial two-hybrid system based on a reconstituted signal transduction pathway. *Proc Natl Acad Sci USA* 95(10):5752–5756.
13. Simon R, Priefer U, Pühler A (1983) A broad-host range mobilization system for in vivo genetic engineering: Transposon mutagenesis in gram-negative bacteria. *Bio/Technology* 1(1):784–791.

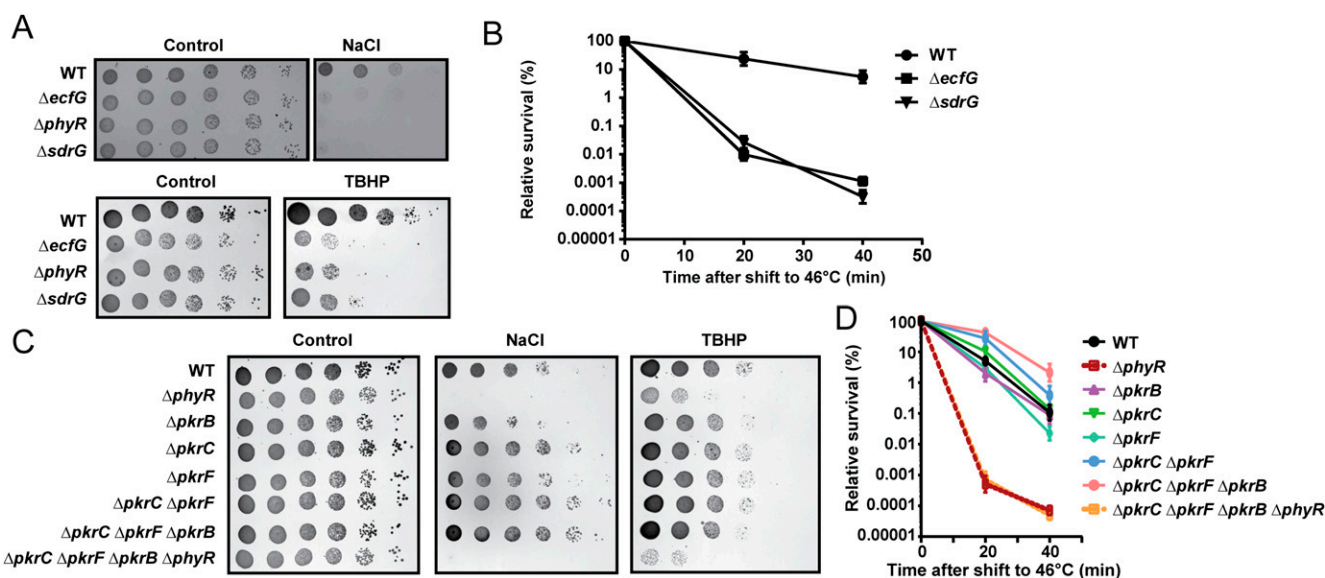

**Fig. S1.** Sensitivity of the *sdrG* (A and B) and cognate SDRR mutants (C and D) toward salt and TBHP stress (A and C) and HS (B and D). Tenfold dilution series are shown in A and C. Mean  $\pm$  SD of three independent experiments is shown in B and D. Genetic nomenclature is the same as in the main text.

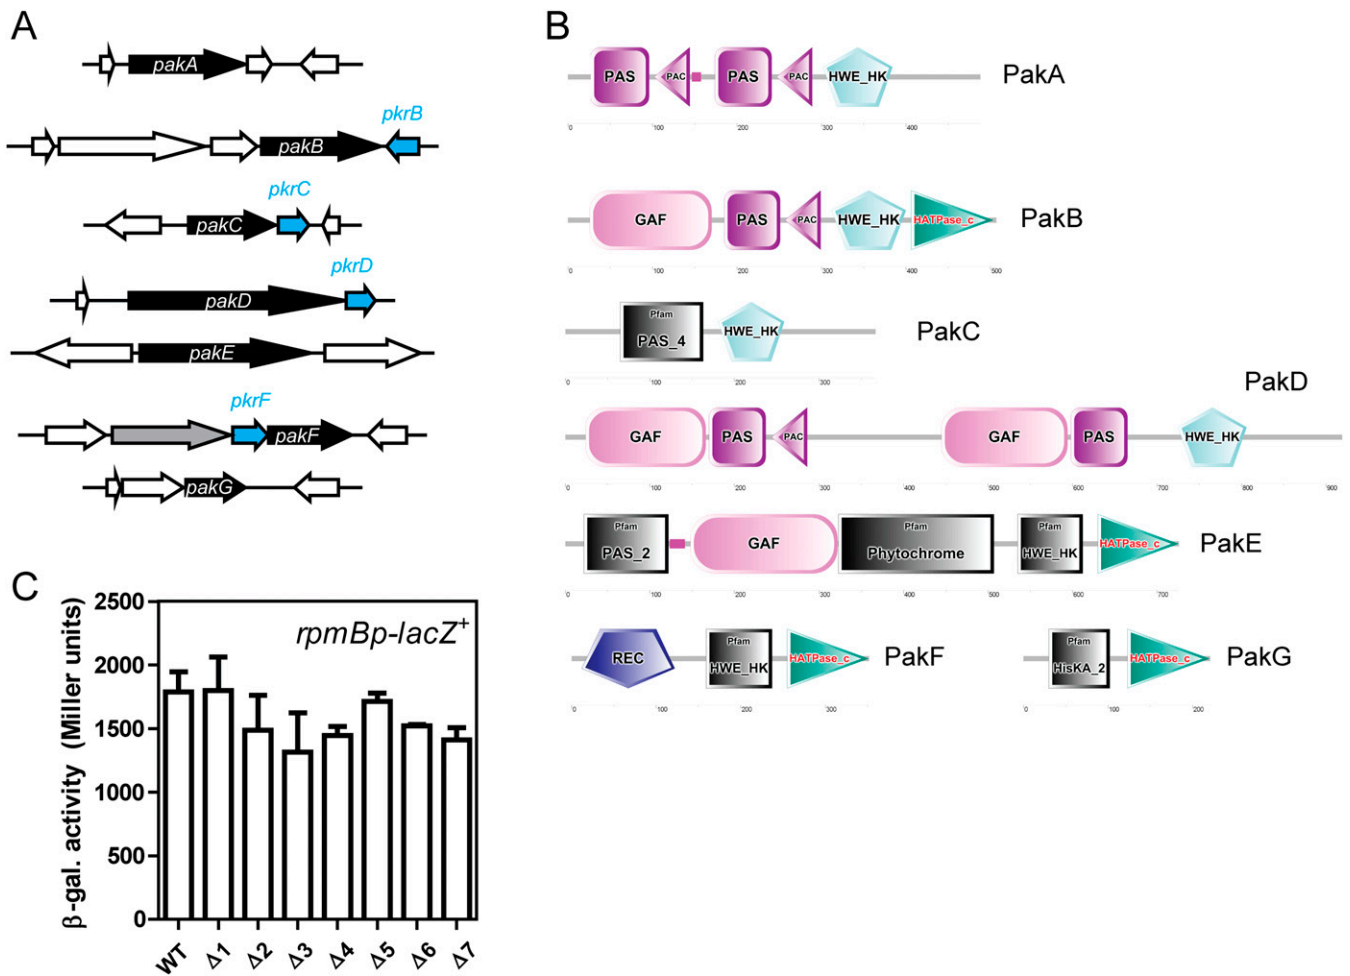

**Fig. S2.** Genetic organization of *pak* loci (A) and domain composition of Paks (B). (A) *pak* ORFs are indicated by black arrows, and ORFs encoding SDRRs are indicated by blue arrows with their names on top; genes unrelated to two-component signaling are indicated by white arrows. The gray arrow at the *pakF* locus indicates another His Kinase-encoding gene. (B) Domain composition of Pak kinases predicted by SMART (1) as of May 28, 2014. (C) Activity of the *rpmBp-lacZ<sup>+</sup>* control fusion in multiple kinase mutants. The nomenclature follows that described in Fig. 2. Mean  $\pm$  SD of three independent experiments is shown.

1. Letunic I, Doerks T, Bork P (2012) SMART 7: Recent updates to the protein domain annotation resource. *Nucleic Acids Res* 40(Database issue):D302–D305.

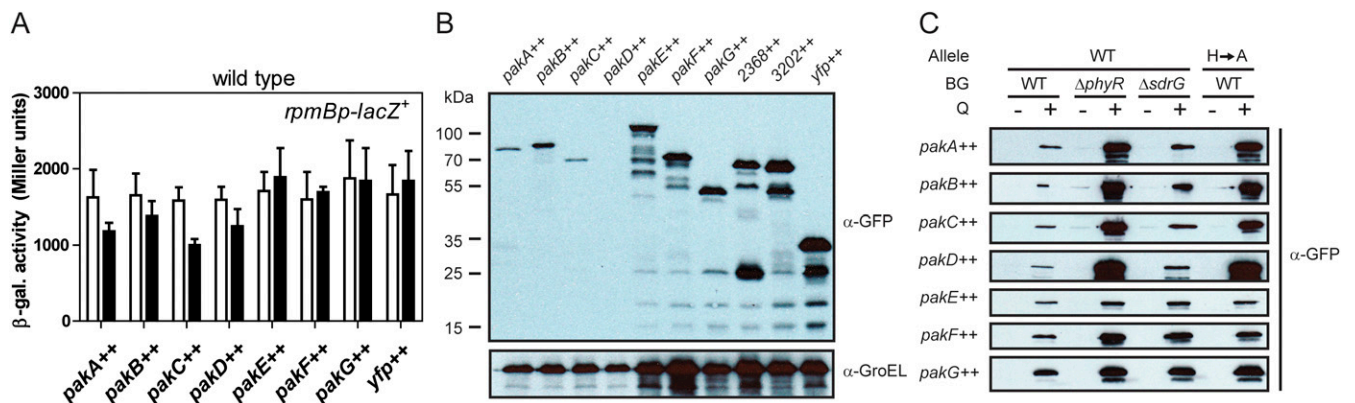

**Fig. S3.** Control experiments for *pak* overexpression. (A) *pak* overexpression does not affect activity of the *rpmBp-lacZ<sup>+</sup>* control fusion. *rpmBp-lacZ<sup>+</sup>* activity was measured before (white bars) and after 2 h of (black bars) induction of kinase overexpression (++) from promoter P<sub>Q5</sub> (plasmid pQYD) with 25  $\mu$ M cumate. (B) Western blot of strains after 2 h of overexpression of *paks* in the WT background. (C) Western blot of strains before (–) and 2 h after (+) addition of cumate (indicated by Q) to induce *pak* expression in different genetic backgrounds.

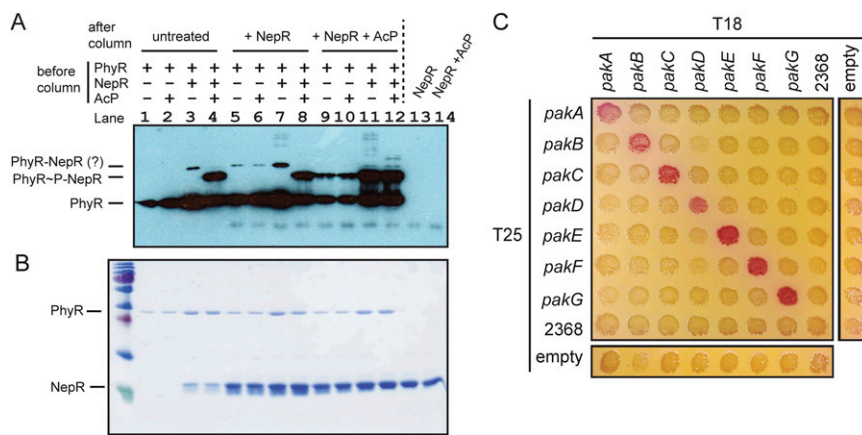

**Fig. 54.** PhyR~P-NepR complex formation depends on coincubation with NepR and acetyl-phosphate (A and B), and Paks form homomers. (A and B) PhyR, NepR, and/or AcP was incubated for 30 min in different combinations ("before column"), followed by removal of AcP. (A) Then ("after column"), samples were left untreated, NepR alone or NepR and AcP were added, and protein complexes were resolved on native gels, followed by immunoblotting against PhyR. (B) Same samples were subjected to standard SDS/PAGE. As seen in the control (A, lane 4), formation of the PhyR~P-NepR complex resulted in a slower migrating band ("PhyR~P-NepR"). Addition of NepR to PhyR preincubated with AcP (A, lane 6) caused no such shift, indicating that PhyR is not phosphorylated. When AcP is added in addition to NepR (A, lane 10), the PhyR~P-NepR complex is readily formed, indicating that the incubation time with NepR (after column) is sufficiently long, in principle, to allow complex formation. Note that an even slower migrating band is observed in samples containing PhyR and NepR without AcP, indicated by "PhyR-NepR (?)," which might consist of unphosphorylated PhyR and NepR; whether this hypothetical complex has biological relevance or is simply an experimental artifact is currently unknown. (C) Bacterial two-hybrid analysis of Pak interactions. *E. coli cya-* (BTH101; Euromedex) carrying fusions of Paks to T18 and T25 fragments of *Bordetella pertussis* adenylate cyclase (1) were spotted on McConkey lactose and incubated at 28 °C for 4 d. Red colonies/spots are indicative of positive interactions.

1. Karimova G, Pidoux J, Ullmann A, Ladant D (1998) A bacterial two-hybrid system based on a reconstituted signal transduction pathway. *Proc Natl Acad Sci USA* 95(10):5752-5756.

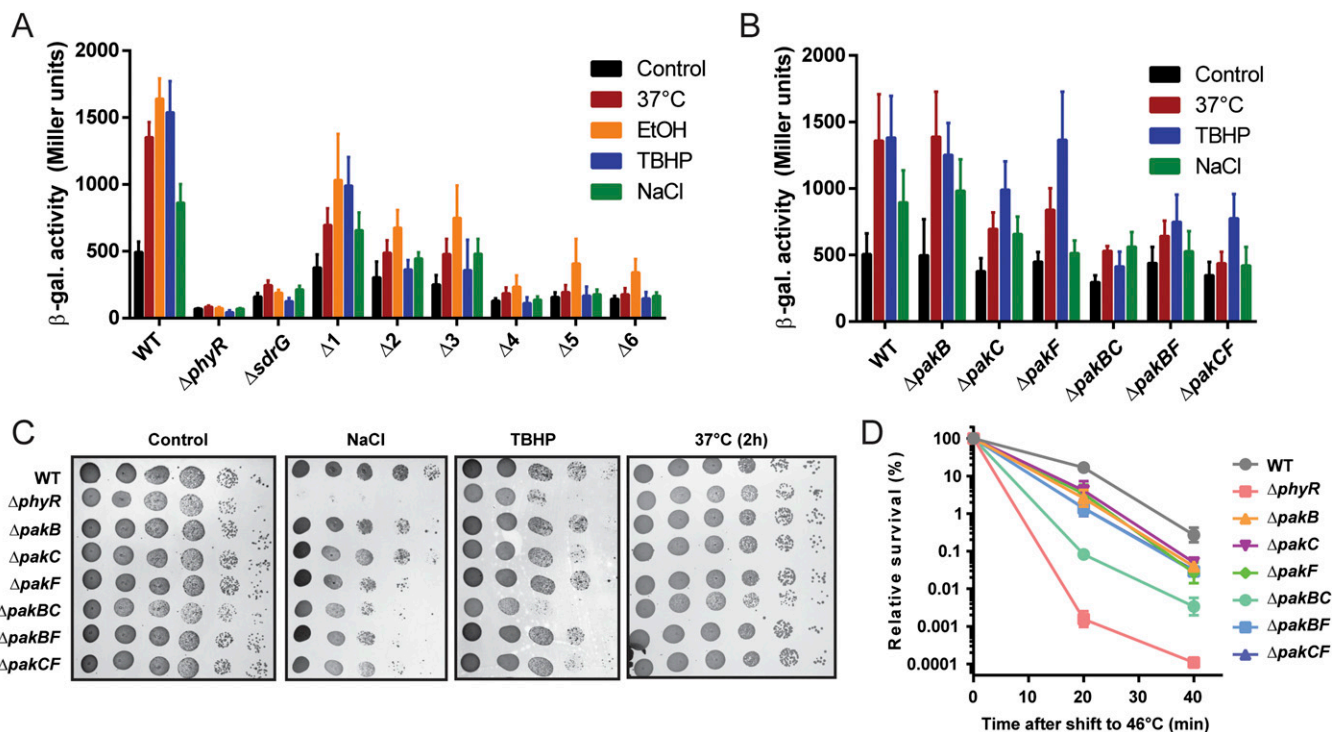

**Fig. 55.** (A and B) β-Gal activity of the *nhaA2p-lacZ<sup>+</sup>* fusion in the multiple kinase and *phyR* and *sdrG* mutants used to calculate RSA shown in Fig. 5. The nomenclature for kinase mutants follows that described in the main text. Mean ± SD of three independent experiments is shown. (C and D) Stress phenotypes of selected single and double *pak* mutants as indicated. Results in D are given as mean ± SD of three independent experiments.

**Table S1. Absence of PhyR and HRXXN kinases in selected Alphaproteobacteria**

| Species                               | Genome, Mbp | PhyR | HRXXN kinases | Classical HK | HHK | HRR | RR | Others | No. of TCS proteins |
|---------------------------------------|-------------|------|---------------|--------------|-----|-----|----|--------|---------------------|
| <i>Pseudovibrio</i> sp. FO-BEG1       | 5.9         | No   | No            | 25           | 8   | 0   | 40 | 2      | 75                  |
| <i>Octadecabacter arcticus</i> 238    | 5.5         | No   | No            | 18           | 2   | 0   | 22 | 0      | 42                  |
| <i>Magnetococcus marinus</i> MC-1     | 4.7         | No   | No            | 29           | 55  | 13  | 71 | 4      | 172                 |
| <i>Acidiphilium multivorum</i> AIU301 | 4.2         | No   | No            | 14           | 2   | 0   | 21 | 0      | 37                  |
| <i>Maricaulis maris</i> MCS10         | 3.4         | No   | No            | 22           | 13  | 1   | 41 | 2      | 79                  |
| <i>Liberibacter crescens</i> BT-1     | 1.5         | No   | No            | 9            | 1   | 0   | 13 | 0      | 23                  |

Completed alphaproteobacterial genomes on the MiST2 database (1) were searched for absence of PhyR and then checked for absence of HRXXN kinases. TCS, two-component system.

1. Ulrich LE, Zhulin IB (2010) The MiST2 database: A comprehensive genomics resource on microbial signal transduction. *Nucleic Acids Res* 38(Database issue):D401–D407.

**Table S2. *S. melonis* Fr1 strains**

| Strain  | Relevant genotype                                                                                                                  | Source     |
|---------|------------------------------------------------------------------------------------------------------------------------------------|------------|
| JVZ857  | <i>Sphingomonas melonis</i> Fr1 WT strain                                                                                          | (1)        |
| JVZ1703 | JVZ857 $\Delta$ ecfG                                                                                                               | (2)        |
| JVZ1704 | JVZ857 $\Delta$ phyR                                                                                                               | (2)        |
| JVZ2520 | JVZ857 $\Delta$ sdrG                                                                                                               | This study |
| JVZ3234 | JVZ857 <i>phyR</i> <sup>D194A</sup>                                                                                                | This study |
| JVZ1817 | JVZ857 $\Delta$ pakA                                                                                                               | This study |
| JVZ2470 | JVZ857 $\Delta$ pakB                                                                                                               | This study |
| JVZ2257 | JVZ857 $\Delta$ pakC                                                                                                               | This study |
| JVZ1818 | JVZ857 $\Delta$ pakE                                                                                                               | This study |
| JVZ1953 | JVZ857 $\Delta$ pakF                                                                                                               | This study |
| JVZ2471 | JVZ857 $\Delta$ pakG                                                                                                               | This study |
| JVZ2521 | JVZ857 $\Delta$ pkrB                                                                                                               | This study |
| JVZ2518 | JVZ857 $\Delta$ pkrC                                                                                                               | This study |
| JVZ2519 | JVZ857 $\Delta$ pkrF                                                                                                               | This study |
| JVZ2509 | JVZ857 $\Delta$ Sphme2DRAFT_2368                                                                                                   | This study |
| JVZ2503 | JVZ857 $\Delta$ ecfG <i>sdrG</i>                                                                                                   | This study |
| JVZ2504 | JVZ857 $\Delta$ phyR $\Delta$ sdrG                                                                                                 | This study |
| JVZ3235 | JVZ857 $\Delta$ sdrG <i>phyR</i> <sup>D194A</sup>                                                                                  | This study |
| JVZ3216 | JVZ857 $\Delta$ pakB $\Delta$ pakF                                                                                                 | This study |
| JVZ3215 | JVZ857 $\Delta$ pakC $\Delta$ pakF                                                                                                 | This study |
| JVZ2259 | JVZ857 $\Delta$ pakC $\Delta$ pakB                                                                                                 | This study |
| JVZ2360 | JVZ857 $\Delta$ pakC $\Delta$ pakB $\Delta$ pakA                                                                                   | This study |
| JVZ2385 | JVZ857 $\Delta$ pakC $\Delta$ pakB $\Delta$ pakA $\Delta$ pakF                                                                     | This study |
| JVZ2399 | JVZ857 $\Delta$ pakC $\Delta$ pakB $\Delta$ pakA $\Delta$ pakE $\Delta$ pakF                                                       | This study |
| JVZ2453 | JVZ857 $\Delta$ pakC $\Delta$ pakB $\Delta$ pakA $\Delta$ pakE $\Delta$ pakF $\Delta$ pakG                                         | This study |
| JVZ3242 | JVZ857 $\Delta$ pakC $\Delta$ pakB $\Delta$ pakA $\Delta$ pakE $\Delta$ pakF $\Delta$ pakG $\Delta$ phyP                           | This study |
| JVZ2507 | JVZ857 $\Delta$ pakC $\Delta$ pakB $\Delta$ pakA $\Delta$ pakE $\Delta$ pakF $\Delta$ pakG $\Delta$ Sphme2DRAFT_2368               | This study |
| JVZ2546 | JVZ857 $\Delta$ pakC $\Delta$ pakB $\Delta$ pakA $\Delta$ pakE $\Delta$ pakF $\Delta$ pakG $\Delta$ Sphme2DRAFT_2368 $\Delta$ phyP | This study |
| JVZ1952 | JVZ857 $\Delta$ pakB $\Delta$ pkrB                                                                                                 | This study |
| JVZ1713 | JVZ857 $\Delta$ pakC $\Delta$ pkrC                                                                                                 | This study |
| JVZ3191 | JVZ857 $\Delta$ pakF $\Delta$ pkrF                                                                                                 | This study |
| JVZ2522 | JVZ857 $\Delta$ pkrC $\Delta$ pkrF                                                                                                 | This study |
| JVZ2541 | JVZ857 $\Delta$ pkrC $\Delta$ pkrF $\Delta$ pkrB                                                                                   | This study |
| JVZ3188 | JVZ857 $\Delta$ pkrC $\Delta$ pkrF $\Delta$ pkrB $\Delta$ phyR                                                                     | This study |
| JVZ3189 | JVZ857 $\Delta$ pkrC $\Delta$ pkrF $\Delta$ pkrB $\Delta$ sdrG                                                                     | This study |
| JVZ1919 | JVZ857 <i>attTn7::nepRp-syfp2/pAK145</i>                                                                                           | This study |

1. Innerebner G, Knief C, Vorholt JA (2011) Protection of *Arabidopsis thaliana* against leaf-pathogenic *Pseudomonas syringae* by *Sphingomonas* strains in a controlled model system. *Appl Environ Microbiol* 77(10):3202–3210.

2. Kaczmarczyk A, Vorholt JA, Francez-Charlot A (2012) Markerless gene deletion system for sphingomonads. *Appl Environ Microbiol* 78(10):3774–3777.

Table S3. Primers

| Primer name                          | Primer sequence (5' to 3')                 | Purpose                              |
|--------------------------------------|--------------------------------------------|--------------------------------------|
| <b>Mutant strain construction</b>    |                                            |                                      |
| PhyR194chrom_R                       | ATTTCTAGAATGCCTTCAGCAGCGTTTCC              | Construction of phyRD194A strain     |
| PhyR194chrom_F                       | ATTTTGGTACCACCAAAGTCGCGTTTCGTTGG           | Construction of phyRD194A strain     |
| PhyR_FR1_D194A F                     | GGTCTGGTGCCTGGCGCGATCCAGCTGGCCGACGAT       | Construction of phyRD194A strain     |
| PhyR_FR1_D194A R                     | ATCGTCCGGCCAGCTGGATCGCCGCCAGCACCAGACC      | Construction of phyRD194A strain     |
| 419up_F                              | ATTTTGGTACCATGACCACCAAGACCATCG             | pakA mutant construction             |
| 419up_R                              | GACGAATGGCGTGTGCGGC                        | pakA mutant construction             |
| 419dw_F                              | GCCGCACACGCCATTCGTGTC ATCGAGGCCCGGTTCTGAGC | pakA mutant construction             |
| 419dw_R                              | ATTTTCTAGATGCGCCGAACCTATTACG               | pakA mutant construction             |
| 885N_up_F                            | ATTTTCTAGAACCAGCGATGCATCAGCACG             | pakB mutant construction             |
| 885N_up_R                            | GCGTCCGCGATCGGCACGCGTTCACAGACGGGTGTCATC    | pakB mutant construction             |
| 885N_dw_F                            | CGCGTGCCGATCGCGACGC                        | pakB mutant construction             |
| 885N_dw_R                            | ATTTGGTACCAATGGCGCATCCGCTGTC               | pakB mutant construction             |
| 1359N_up_F                           | ATTTTCTAGAAGATCGGGTCCGAACAGCC              | pakC mutant construction             |
| 1359N_up_R                           | GACGGCGCGATGGTCACG                         | pakC mutant construction             |
| 1359N_dw_F                           | CGTGACCATCGCCGCGTCTATCAGGTTCAAGAGGCG       | pakC mutant construction             |
| 1359N_dw_R                           | ATTTGGTACCTGTCCGTTCCGGTGGTTTGG             | pakC mutant construction             |
| 2513up_F                             | ATTTTGGTACCTCTCGCCAGCGGATGGAGG             | pakE mutant construction             |
| 2513up_R                             | GTGGGAAATCGCCATATATCAC                     | pakE mutant construction             |
| 2513dw_F                             | GTGATAATGGCGATTTCCACACCCGCCCGATTGCGGAAG    | pakE mutant construction             |
| 2513dw_R                             | ATTTTCTAGAATCACGATCCAGACCCGTC              | pakE mutant construction             |
| 1301up_F                             | ATTTTGGTACCATCGGGCCAGCAGACGACG             | pakF mutant construction             |
| 1301up_R                             | CGCCGCGCGCAGCGTTGC CGGCTGGCCCGCCGACG       | pakF mutant construction             |
| 1301dw_F                             | GCAACGCTGCGCGCGGC                          | pakF mutant construction             |
| 1301dw_R                             | ATTTTCTAGATAGGCGGCGATATGTCTGTCG            | pakF mutant construction             |
| 3817up_R                             | GGCTCGCCATCGGCACCCCTCTCGGAATCGTTTCATGGC    | pakG mutant construction             |
| 3817dw_F                             | AGGGTGCCGATGGCGAGCC                        | pakG mutant construction             |
| 3817dw_R                             | ATTTCTAGATTGTTCTCCGCGATCGCG                | pakG mutant construction             |
| 3817up_F                             | ATTTGGTACCTGACAAAGTTTCGTTCCAGC             | pakG mutant construction             |
| BK51_up_F                            | ATTTGGTACCTTACC CGCGCCGACGTCG              | sdrG mutant construction             |
| BK51_dw_R                            | ATTTTCTAGATTGCCGGCGCGCCCGCAGG              | sdrG mutant construction             |
| BK51_up_R                            | GGGGCGTTACAGCGCGCGGTTAGCCGACACATGCC        | sdrG mutant construction             |
| BK51_dw_F                            | GCCGCGCTGTAACGCC                           | sdrG mutant construction             |
| 1662up_R                             | GTGTTCTCGACCTCGGGTTGATGGGCGTTTCATGACG      | prkF mutant construction             |
| 1662dw_F                             | CCCGAGGTCGAGGAACAC                         | prkF mutant construction             |
| 1662up_F                             | ATTTCTAGAACGAGGAAATCCAGCGC                 | prkF mutant construction             |
| 1662dw_R                             | ATTTGGTACCATCGATTCCGCGACAAGG               | prkF mutant construction             |
| 1661-2_up_F                          | ATTTCTAGAAACGAGGAAATCCAGCGC                | prkF pakF double-mutant construction |
| 1661-2_up_R                          | GCTTATGCCATCGCCGCGGTTGATGGGCGTTTCATGACG    | prkF pakF double-mutant construction |
| 1661-2_dw_F                          | CGCCGCGCGATGGCATAAGC                       | prkF pakF double-mutant construction |
| 1661-2_dw_R                          | ATTTGGTACCATAGCGCGCGATATGTCTG              | prkF pakF double-mutant construction |
| 2368dw_F                             | CATCATGTCCGTCGAAGCAAGCGGGCTAGTGTACAGC      | Sphme2DRAFT_2368 mutant construction |
| 2368up_R                             | TGCTTCGACGGACATGATG                        | Sphme2DRAFT_2368 mutant construction |
| 2368up_F                             | ATTTGGTACCACCGTGCCCGATGTCTGC               | Sphme2DRAFT_2368 mutant construction |
| 2368dw_R                             | ATTTCTAGAATCTGCCGCGACATCGTGG               | Sphme2DRAFT_2368 mutant construction |
| 1360dw_F                             | CGACATGGGACAGTCCGAAAACCGCTCAGCTGCTTGAG     | prkC mutant construction             |
| 1360up_R                             | TTCGGACTGTCCCATGTCTG                       | prkC mutant construction             |
| 1360up_F                             | ATTTCTAGATATACGCCGATCGCGACG                | prkC mutant construction             |
| 1360dw_R                             | ATTTGGTACCATCGATCTCGCCGATGTC               | prkC mutant construction             |
| 1359.1360dw_F                        | CGTGACCATCGCCGCGTCTGTAAACCGCTCAGCTGC       | prkC pakC double-mutant construction |
| 1359.1360up_R                        | GACGGCGCGATGGTCACG                         | prkC pakC double-mutant construction |
| 1359.1360dw_R                        | ATTTTCTAGAGATCTCGCCGATGCCAGC               | prkC pakC double-mutant construction |
| 1359.1360up_F                        | ATTTTGGTACCCTGACGCGCGTCTCATGG              | prkC pakC double-mutant construction |
| 884dw_F                              | GGATGGATGATGACCAAAAAGCCGTCAGGCCTAGGCG      | prkB mutant construction             |
| 884up_R2                             | TTTGGTCATCATCCATCCTGG                      | prkB mutant construction             |
| 884dw_R                              | ATTTGGTACCATCGAATATCGCCTGCGC               | prkB mutant construction             |
| 884 upF2                             | ATTTTCTAGAACTTCATGGAGCGTCTGTCTG            | prkB mutant construction             |
| 884.885dw_F                          | GGTTTCTCGGCTCCAAGCCAGAAGACGGCTCAGAACGG     | prkB pakB double-mutant construction |
| 884.885up_R                          | TGGCTTGGAGCCGAGAACC                        | prkB pakB double-mutant construction |
| 884.885up_F                          | ATTTTGGTACCACGCGCTGCTCCGCCCGC              | prkB pakB double-mutant construction |
| 884.885dw_R                          | ATTTTCTAGAAGCACGATCGCCGTCAC                | prkB pakB double-mutant construction |
| <b>pENTR and expression plasmids</b> |                                            |                                      |
| pENTR4_linker_F                      | GCGGTAGCGGCAGCCATATGACCATGGGAACCAATTTCAG   | Construction of pENTR4b              |

Table S3. Cont.

| Primer name                | Primer sequence (5' to 3')               | Purpose                                                       |
|----------------------------|------------------------------------------|---------------------------------------------------------------|
| pENTR4_linker_R            | TACCGCTGCCGCTACCGGAGCCTGCTTTTTGTACAAAG   | Construction of pENTR4b                                       |
| 419FL_ENTR_F               | ATTTGGTACCGAGTGCCGCACACGCCATTCG          | pakA in pENTR4a                                               |
| 419_ENTR_R                 | ATTTTCTCGAGTCAGACCGGGGCCCTCGATCG         | pakA in pENTR4a; truncated pakA in pENTR4a (for purification) |
| 885FL_ENTR_F               | ATTTGGTACCGAATGACACCCGCTGTGTAAC          | pakB in pENTR4a                                               |
| 885ENTR_XbaI_R             | ATTTCTAGACTAGGCGCGGTTCCAGCGTCG           | pakB in pENTR4a                                               |
| 1359ENTR_F3                | ATTTGGTACCGAGTGACCATCGCCGCGGTC           | pakC in pENTR4b                                               |
| 1359ENTR_R3                | ATTTCTAGATGTCCCATGTCGTGTGCTG             | pakC in pENTR4b                                               |
| 2513FL_ENTR_F              | ATTTGGTACCGAATGGCGATTTCCACCCG            | pakE in pENTR4a                                               |
| 2513ENTR_R                 | ATTTTCTAGATTACTCTTCCGCAATCGGGGCG         | pakE in pENTR4a; truncated pakE in pENTR4b (for purification) |
| 1301FL_ENTR_F              | ATTTGGTACCGACTGATCTGACCCAGGTTTC          | pakF in pENTR4a                                               |
| 1301ENTR_R                 | ATTTTCTAGATTATGCCATCGCCGCGCGCAGC         | pakF in pENTR4a                                               |
| 3817ENTR_F                 | ATTTGGTACCGAATGAACGATTCGAGATGG           | pakG in pENTR4a                                               |
| 3817ENTR_R                 | ATTTCTAGATGACGCCTAGTGGCTCGCC             | pakG in pENTR4a                                               |
| phyR_ENTR_F                | ATTTTGGTACCGAATGTCGCTTGGACAGCAACTC       | phyR in pENTR4a                                               |
| phyR_ENTR_R                | ATTTTCTCGAGTCACGCAACCCGCTCGG             | phyR in pENTR4a                                               |
| BK51comp_F                 | ATTTTCTAGAAAGGCTGGGGCATGTCTGCG           | sdrG complementation                                          |
| BK51comp_R                 | ATTTGGTACCTTACAGCGCGGCGAGAGC             | sdrG complementation                                          |
| 2886ENTR_F2                | ATTTGGTACCGAATGTCGCGCTCACCCAG            | sdrG in pENTR4b                                               |
| 2886ENTR_R2                | ATTTCTAGATTACAGCGCGGCGAGAGC              | sdrG in pENTR4b                                               |
| 2886_pET_F                 | ATTTCCATATGTCGCGCTCACCCAGATC             | sdrG in pET26bII                                              |
| 2886_pET_R                 | ATTTGGTACCGAATGTCGCGCTCACCCAGCTTGG       | sdrG in pET26bII                                              |
| 2368ENTR_R                 | ATTTCTAGAAATCACTCGCGCCACTCGTCCG          | Sphme2DRAFT_2368 in pENTR4a                                   |
| 2368ENTR_F2                | ATTTGGTACCGAATGCAGAACTCTGTCCGG           | Sphme2DRAFT_2368 in pENTR4a                                   |
| 3203ENTR_F                 | ATTTGGTACCGAGTGACGGACCGTCCGGGCG          | Sphme2DRAFT_3203 in pENTR4a                                   |
| 3203ENTR_R                 | ATTTCTAGAAATCACTGGACGGCCCGTGG            | Sphme2DRAFT_3203 in pENTR4a                                   |
| 419s_ENTR_F                | ATTTTGGTACCGAACGGCGCGCAAATTCGCC          | Truncated pakA in pENTR4a (for purification)                  |
| 885s_ENTR_F                | ATTTTGGTACCGAACGGCGCGCAAATTCGCC          | Truncated pakB in pENTR4a (for purification)                  |
| 885_ENTR_R                 | ATTTTCTCGAGCTAGCGCGGTTTCAGCGTCG          | Truncated pakB in pENTR4a (for purification)                  |
| 2513ENTR_F                 | ATTTGGTACCGAGAGGTCAATCACCCGCTGC          | Truncated pakE in pENTR4a (for purification)                  |
| Mutant alleles             |                                          |                                                               |
| 419H-A_F                   | CGCGAGCTGACGGCCCGGGTGAAGAAC              | PakA(H305A)                                                   |
| 419H-A_R                   | GTTCTTCAACCCGGGCGCTCAGCTCGCG             | PakA(H305A)                                                   |
| 885H-A_F                   | CCAGGAGCTGTCAGCCCGGATCAAGAAC             | PakB(H315A)                                                   |
| 885H-A_R                   | GTTCTTGATCCGGGCTGACAGCTCCTCG             | PakB(H315A)                                                   |
| 1359H-A_F                  | GAATGAGGAACTGGCGGCTCGGATCAAGAACAC        | PakC(H184A)                                                   |
| 1359H-A_R                  | GTGTTCTTGATCCGAGCCGCCAGTTCCTCATTC        | PakC(H184A)                                                   |
| 3381H-A_F                  | CTCAATGGCGAATTGAGCGCTCGATTGAAAAACGTCCTTG | PakD(H728A)                                                   |
| 3381H-A_R                  | CAAGACGTTTTTCAATCGAGCGCTCAATTCGCCATTGAG  | PakD(H728A)                                                   |
| 2513H-A_F                  | GAAGGAGGTCAATGCCCGCGTGCAGAAC             | PakE(H538A)                                                   |
| 2513H-A_R                  | GTTCTGACACGGGCGATTGACCTCCTTC             | PakE(H538A)                                                   |
| 1301H-A_F                  | CTGTCCGAAGTGAACGCCCGCGTCCCAATTC          | PakF(H162A)                                                   |
| 1301H-A_R                  | GAATGGCGACGCGGGCGTTCACCTCCGGACAG         | PakF(H162A)                                                   |
| 3817H-A_F                  | GCGCGAAACCAATGCTCGGTGCAGCAAC             | PakG(H33A)                                                    |
| 3817H-A_R                  | GTTGCTGCACCGAGCATTGGTTTCGCGC             | PakG(H33A)                                                    |
| 2886(D56A)_R               | CGCCGCGCAGGTTGACGGCGAGGATCGCAGCGTCG      | SdrB(D56A)                                                    |
| 2886(D56A)_F               | CGACGCTGCGATCCTCGCGGTCAACCTGCGCGGCG      | SdrG(D56A)                                                    |
| 2886(D56E)_F               | CGACGCTGCGATCCTCGAGGTCAACCTGCGCGGCG      | SdrG(D56E)                                                    |
| 2886(D56E)_R               | CGCCGCGCAGGTTGACCTCGAGGATCGCAGCGTCG      | SdrG(D56E)                                                    |
| Bacterial two-hybrid assay |                                          |                                                               |
| 419BTH_F                   | ATTTTCTAGAGGTGCCGCACACGCCATTCG           | pakA for BacTH                                                |
| 419BTH_R                   | ATTTTGGTACCGCGACCGGGCCCTCGATCCG          | pakA for BacTH                                                |
| 885BTH_F                   | ATTTTCTAGAGATGACACCCGCTGTGTAAC           | pakB for BacTH                                                |
| 885BTH_R                   | ATTTTGGTACCGCGCGGCTTCAAGCCTCGC           | pakB for BacTH                                                |
| 1359BTH_F                  | ATTTTCTAGAGGTGACCATCGCCCGGCTCC           | pakC for BacTH                                                |
| 1359BTH_R                  | ATTTTGGTACCGCGCCTCTTGAACCTGATAG          | pakC for BacTH                                                |
| 3381BTH_F                  | ATTTTCTAGAGATGACTGATCTTGGAGCG            | pakD for BacTH                                                |
| 3381BTH_R                  | ATTTTGGTACCGCGCGGTTACCAATTCGCGCTGC       | pakD for BacTH                                                |
| 2513BTH_F                  | ATTTTCTAGAGATGGCGAATTTCCACCCG            | pakE for BacTH                                                |
| 2513BTH_R                  | ATTTTGGTACCGCCTCTTCCGCAATCGGGGCG         | pakE for BacTH                                                |
| 1301BTH_F                  | ATTTTCTAGAGCTGATCCTGACCCAGGTTTC          | pakF for BacTH                                                |



Table S3. Cont.

| Primer name                                              | Primer sequence (5' to 3')                                                 | Purpose                    |
|----------------------------------------------------------|----------------------------------------------------------------------------|----------------------------|
| 1301BTH_R                                                | ATTTTGGTACCGCTGCCATCGCCGCGGCAGC                                            | pakF for BacTH             |
| 3817BTH_F                                                | ATTTTCTAGAGATGAACGATTCGAGATGG                                              | pakG for BacTH             |
| 3817BTH_R                                                | ATTTTGGTACCGCGTGGCTCGCCATCGGCAC                                            | pakG for BacTH             |
| 2368BTH_F2                                               | ATTTTCTAGAGATGCAGAACTCTGTCCGG                                              | Sphme2DRAFT_2368 for BacTH |
| 2368BTH_R                                                | ATTTTGGTACCGCCTCGCGCCACTCGTCGGC                                            | Sphme2DRAFT_2368 for BacTH |
| <b>Construction of transposons</b>                       |                                                                            |                            |
| VanR_F                                                   | ATTTACATGTTTTTCAGTCGGCGGGAATGC                                             |                            |
| VanR_R                                                   | ATTTAAGCTTCACTCGAGGAATTAATCCTCCTCGCATCGTGGTTCG                             |                            |
| Pvan2_F                                                  | GTTTGATTACGATCTAACTGCATTGGATCCAATAG                                        |                            |
| Pvan2_R                                                  | CTATTGGATCCAATGCAGTATAGATCGTAATCAAAC                                       |                            |
| Pvan_R2                                                  | ATTTAAGCTTCTCACTCGAGGAATTAATCGTTTTCTCGCATCGTGGTTCGG                        |                            |
| VanR_RBS2_s                                              | CATGACCTCCTCTAGCCGACCGACTGAGACGCTCACAAGCGTTC                               |                            |
| VanR_RBS2_as                                             | AATTGAACGCTTGTGAGCGTCTCAGTCGGTCGGCTAGAGGAGGT                               |                            |
| tnp_Oend_F                                               | ATTTTATTAATGGGACTTGTGTATAAGAGTCAGATGATAACTTCTGTCTCTTC                      |                            |
| tnp_R                                                    | ATTTTCGATCGAAAAGTAGTCAGATCTTGATCCCCCTGC                                    |                            |
| CAT_F_Spel                                               | ATTTTACTAGTGTGTATGTCGGCGGTGC                                               |                            |
| CAT_R_lend_PvuI                                          | ATTTTCGATCGAGATCTGATCAAGAGACAGAGCACCAGGCGTTTAAGG                           |                            |
| Himar1W119A_F                                            | GCTCTGTGCGAAAGCGGTGCCGCGGAGCTCAC                                           |                            |
| Himar1W119A_R                                            | GTGAGCTCGCGCGCACCGCTTTCGCACAGAGC                                           |                            |
| Himar1_F                                                 | ATTTATTAATGACTCTAGAGACCGGGACTTATCAGCCAACCTGTTACTAG<br>AATAGCAGGAGGAATTCACC |                            |
| Himar1_R                                                 | ATTTTCGATCGATTACTAGTATTATTCAACATAGTTCC                                     |                            |
| CAT_himer1ITR_R                                          | ATTTTCGATCGCTCTAGAGACCGGGACTTATCAGCCAACCTGTTACTAGAA<br>GCACCAGGCGTTTAAGG   |                            |
| <b>PhyR cascade down selection and reporters fusions</b> |                                                                            |                            |
| nepRp-CAS_F                                              | ATTTTCTCGAGTTTTGCTCACATGTGATGG                                             |                            |
| nepRp-CAS_R                                              | ATTTTGGGCCACGGCCAGTGAATTCCTGG                                              |                            |
| nepRcore_as                                              | GATCGCGGATGAAACCAAAGTCGCGTTCGTTGGTTCCATTGCAGC                              |                            |
| nepRcore_s                                               | AGCTGCTGCAATGGAACCAACGAACGCGACTTTGGTTTCATCGCC                              |                            |
| ecfG2p_F2                                                | ATTTAAGCTTACCGCGCTTTGTTTCG                                                 |                            |
| ecfG2p_R2                                                | ATTTTCTAGACGATCGAACAGGCAGC                                                 |                            |
| rpsL88_RBS_F                                             | ATTTGGATCCATATACGAGGAGGAGGTTTCATGC                                         |                            |
| rpsL88_R2                                                | ATTTGAATTCACGCGTTATCACTTCGGGC                                              |                            |
| rpmB_R                                                   | ATTTGGTACCCTGAATTCGGTTGCCCGG                                               |                            |
| rpmB_F                                                   | ATTTAAGCTTTGGCGTAACAACGCCGG                                                |                            |
| FLP_F                                                    | ATTTACGCGTTACTAAGGAGGTTGTATGC                                              |                            |
| FLP_R                                                    | ATTTGAATTCATAATGCGTACTTATATGC                                              |                            |
| Arb-P1                                                   | GGCCACGCGTGCAC TAGTCANNNNNNNNNGCTCG                                        |                            |
| Arb-P2                                                   | GGCCACGCGTGCAC TAGTCANNNNNNNNNGACTC                                        |                            |
| Arb-P3                                                   | GGCCACGCGTGCAC TAGTCANNNNNNNNNGATAC                                        |                            |
| Anchor-P                                                 | GGCCACGCGTGCAC TAGTCA                                                      |                            |
| pAK411-nested1                                           | CTTTATGCGCGCATGTCC                                                         |                            |
| pAK411-nested2                                           | GACTGAGACGCTCACAAGCG                                                       |                            |

**Table S4. Locus tags of genes described in this study**

| Name        | Locus_tag (IMG annotation) |
|-------------|----------------------------|
| <i>phyP</i> | Sphme2DRAFT_1443           |
| <i>nepR</i> | Sphme2DRAFT_1444           |
| <i>phyR</i> | Sphme2DRAFT_1445           |
| <i>ecfG</i> | Sphme2DRAFT_1447           |
| <i>sdrG</i> | Sphme2DRAFT_3354           |
| <i>pakA</i> | Sphme2DRAFT_2181           |
| <i>pakB</i> | Sphme2DRAFT_0513           |
| <i>pakC</i> | Sphme2DRAFT_2824           |
| <i>pakD</i> | Sphme2DRAFT_3654           |
| <i>pakE</i> | Sphme2DRAFT_2488           |
| <i>pakF</i> | Sphme2DRAFT_1661           |
| <i>pakG</i> | Sphme2DRAFT_3817           |
| <i>pkxB</i> | Sphme2DRAFT_0512           |
| <i>pkxC</i> | Sphme2DRAFT_2825           |
| <i>pkxD</i> | Sphme2DRAFT_3653           |
| <i>pkxF</i> | Sphme2DRAFT_1662           |

According to Integrated Microbial Genomes (IMG; [img.jgi.doe.gov/cgi-bin/w/main.cgi](http://img.jgi.doe.gov/cgi-bin/w/main.cgi)) as of September 24, 2014.
